# Supplementary material for: The European summer heatwave of 2019 – a regional storyline perspective
Source: Copernicus journal article supplement (doi:10.5194/esd-16-239-2025), 2025-02-03
Supplement: Supplementary file 1 [file esd-16-239-2025-supplement.pdf]

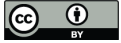

*Supplement of*

## **The European summer heatwave of 2019 – a regional storyline perspective**

**Tatiana Klimiuk et al.**

*Correspondence to:* Tatiana Klimiuk ([tatiana.klimiuk@kit.edu](mailto:tatiana.klimiuk@kit.edu))

The copyright of individual parts of the supplement might differ from the article licence.

## Supplementary material for Klimiuk et al., 2024

This document includes one table and 17 figures

Table S1: List of DWD stations used for validation of present-day storylines with their coordinates and names, sorted by latitude.

| ST_ID | ST_LON  | ST_LAT  | ST_NAME                |
|-------|---------|---------|------------------------|
| 01550 | 11.0621 | 47.4830 | Garmisch-Partenkirchen |
| 01346 | 8.0038  | 47.8748 | Feldberg/Schwarzwald   |
| 01262 | 11.8134 | 48.3477 | München-Flughafen      |
| 15444 | 9.9216  | 48.4418 | Ulm-Mähringen          |
| 04177 | 8.3301  | 48.9726 | Rheinstetten           |
| 03667 | 11.2539 | 49.4258 | Nürnberg-Netzstall     |
| 03904 | 6.3789  | 49.5354 | Perl-Nennig            |
| 07341 | 8.7862  | 50.0900 | Offenbach-Wetterpark   |
| 00867 | 10.9679 | 50.3066 | Lautertal-Oberlauter   |
| 02667 | 7.1575  | 50.8645 | Köln-Bonn              |
| 01050 | 13.8470 | 51.0221 | Dresden-Hosterwitz     |
| 04763 | 9.9266  | 51.0607 | Sontra                 |
| 02932 | 12.2396 | 51.4347 | Leipzig/Halle          |
| 00617 | 6.8863  | 51.8730 | Borken in Westfalen    |
| 03987 | 13.0622 | 52.3812 | Potsdam                |
| 02014 | 9.6779  | 52.4644 | Hannover               |
| 00691 | 8.7981  | 53.0451 | Bremen                 |
| 03196 | 11.9321 | 53.3222 | Marnitz                |
| 01981 | 9.8957  | 53.4776 | Hamburg-Neuwiedenthal  |
| 05097 | 12.7655 | 54.0654 | Tribsees               |

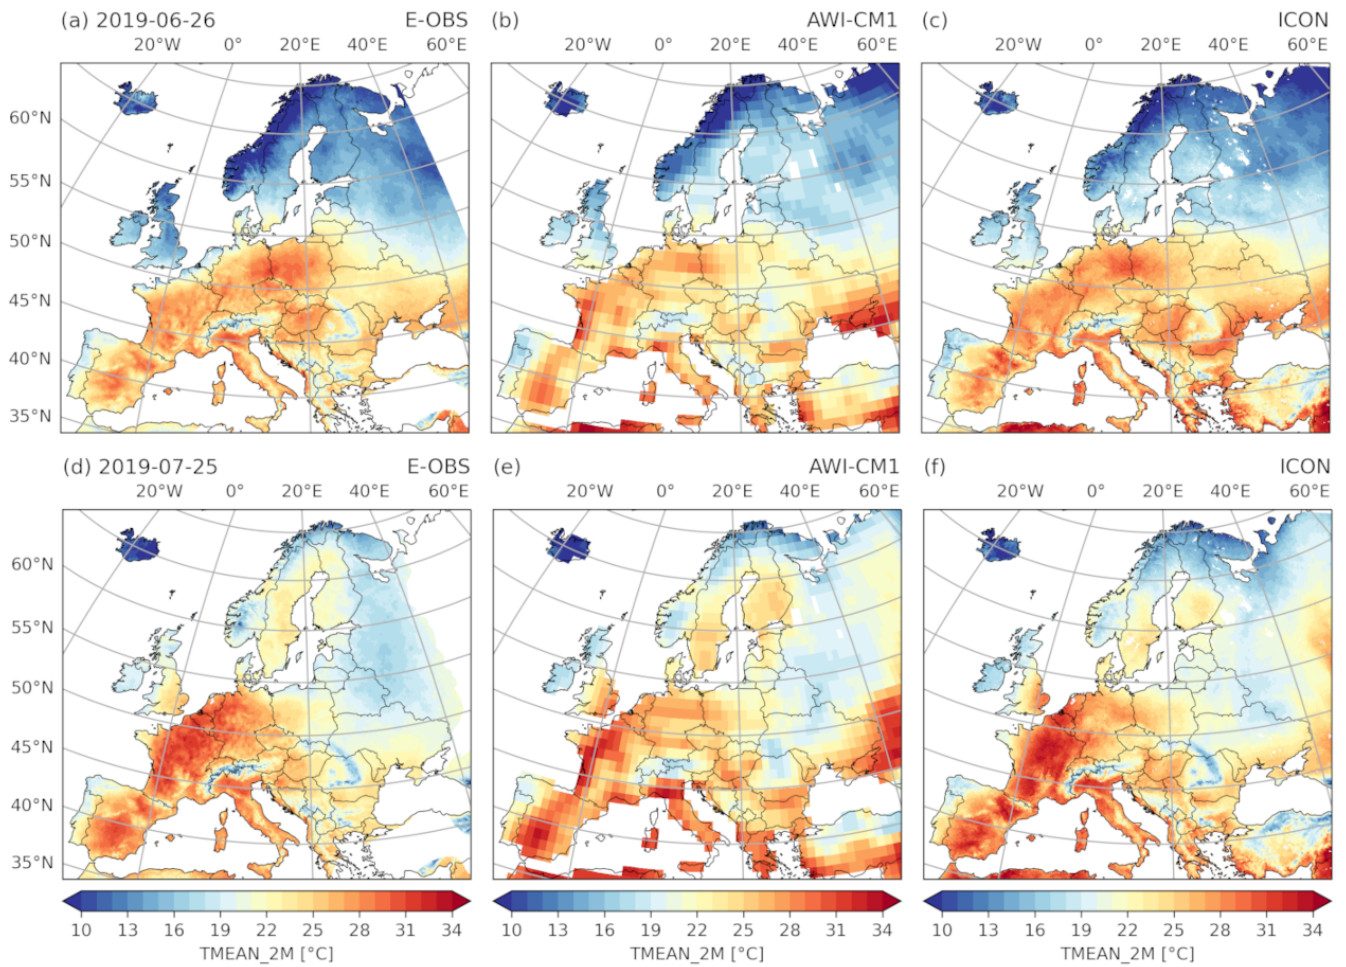

Figure S1: Mean 2m temperature on 26.06.2019 (first peak of the June heatwave) and 25.07.2019 (peak of the July heatwave) for E-OBS (left), AWI-CM1 (middle), and ICON EUR-12 (right).

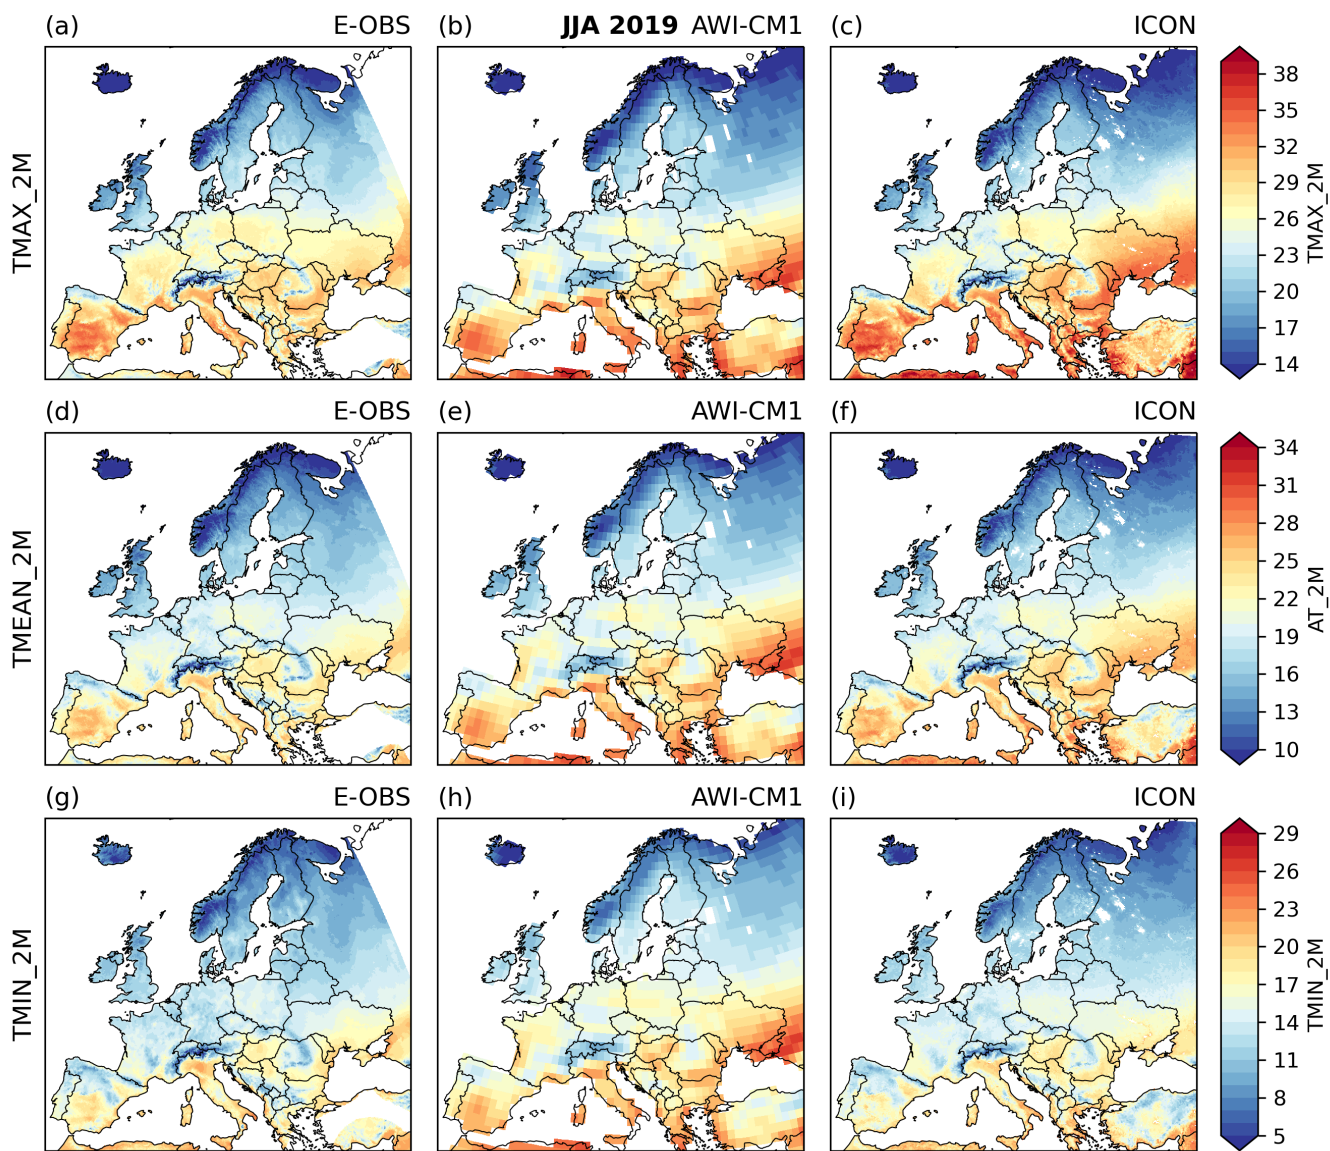

Figure S2: Seasonally averaged maximum, mean, and minimum 2m temperature in June - August 2019 as of (left) E-OBS, (middle) AWI-CM1, (right) ICON EUR-12.

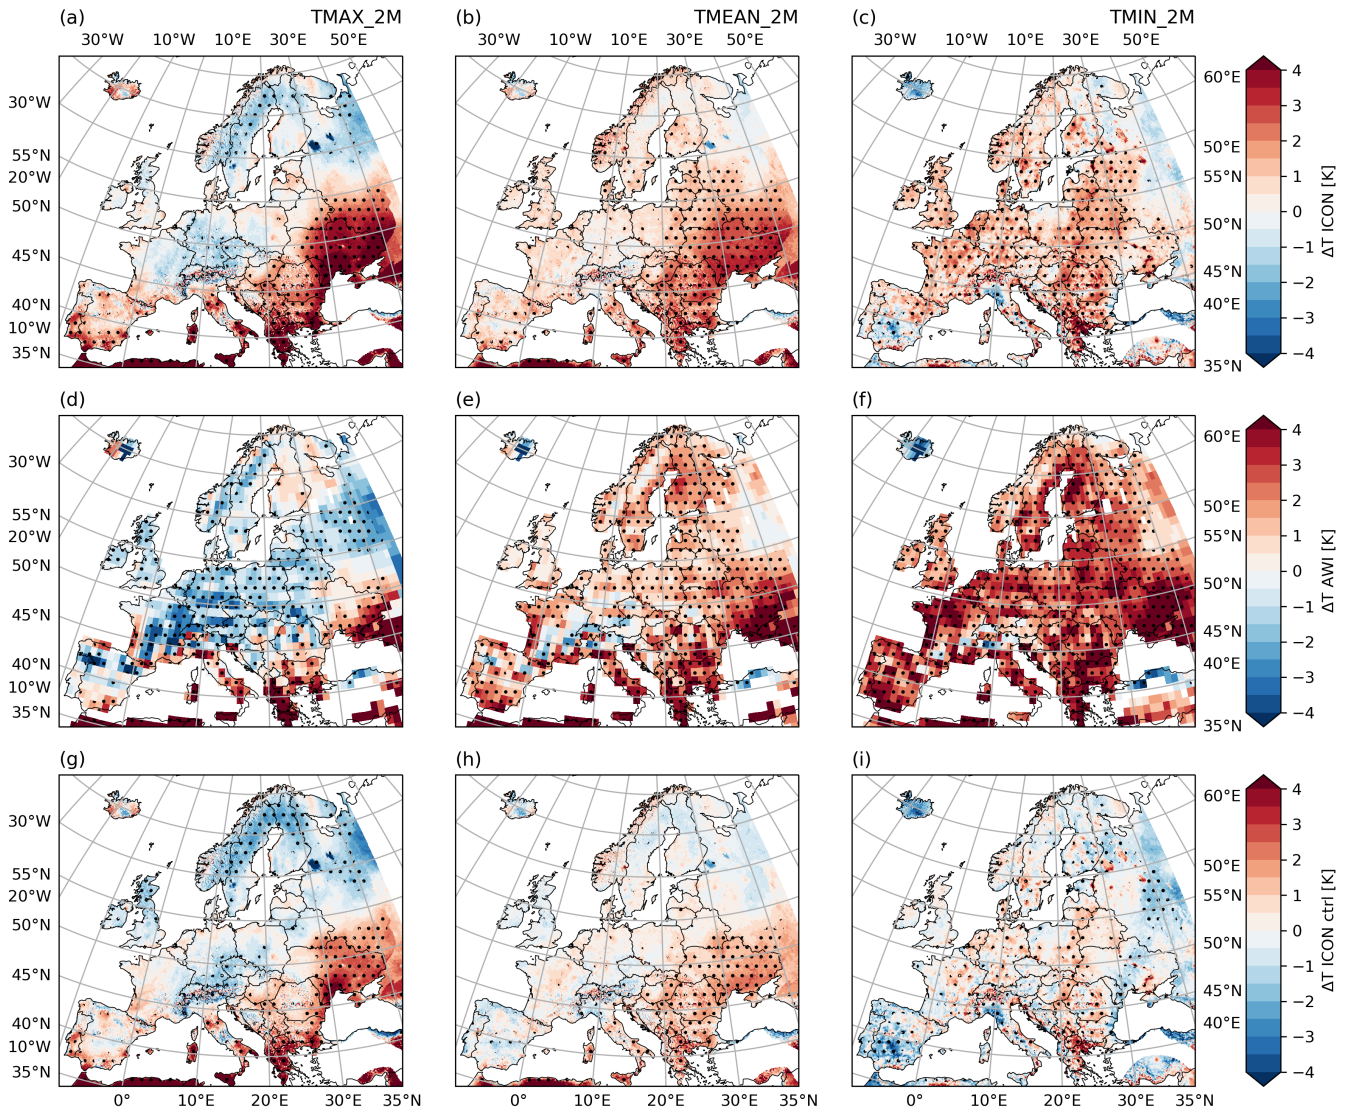

Figure S3: Seasonal mean bias of 2m temperature w.r.t. E-OBS in 2019 for (a-c) ICON EUR-12 simulation, (d-f) AWI-CM1 simulation, (g-i) ICON EUR-12 control simulation driven by ERA5. Hatched areas indicate regions where the bias to E-OBS is statistically significant with a p-value threshold of 0.05

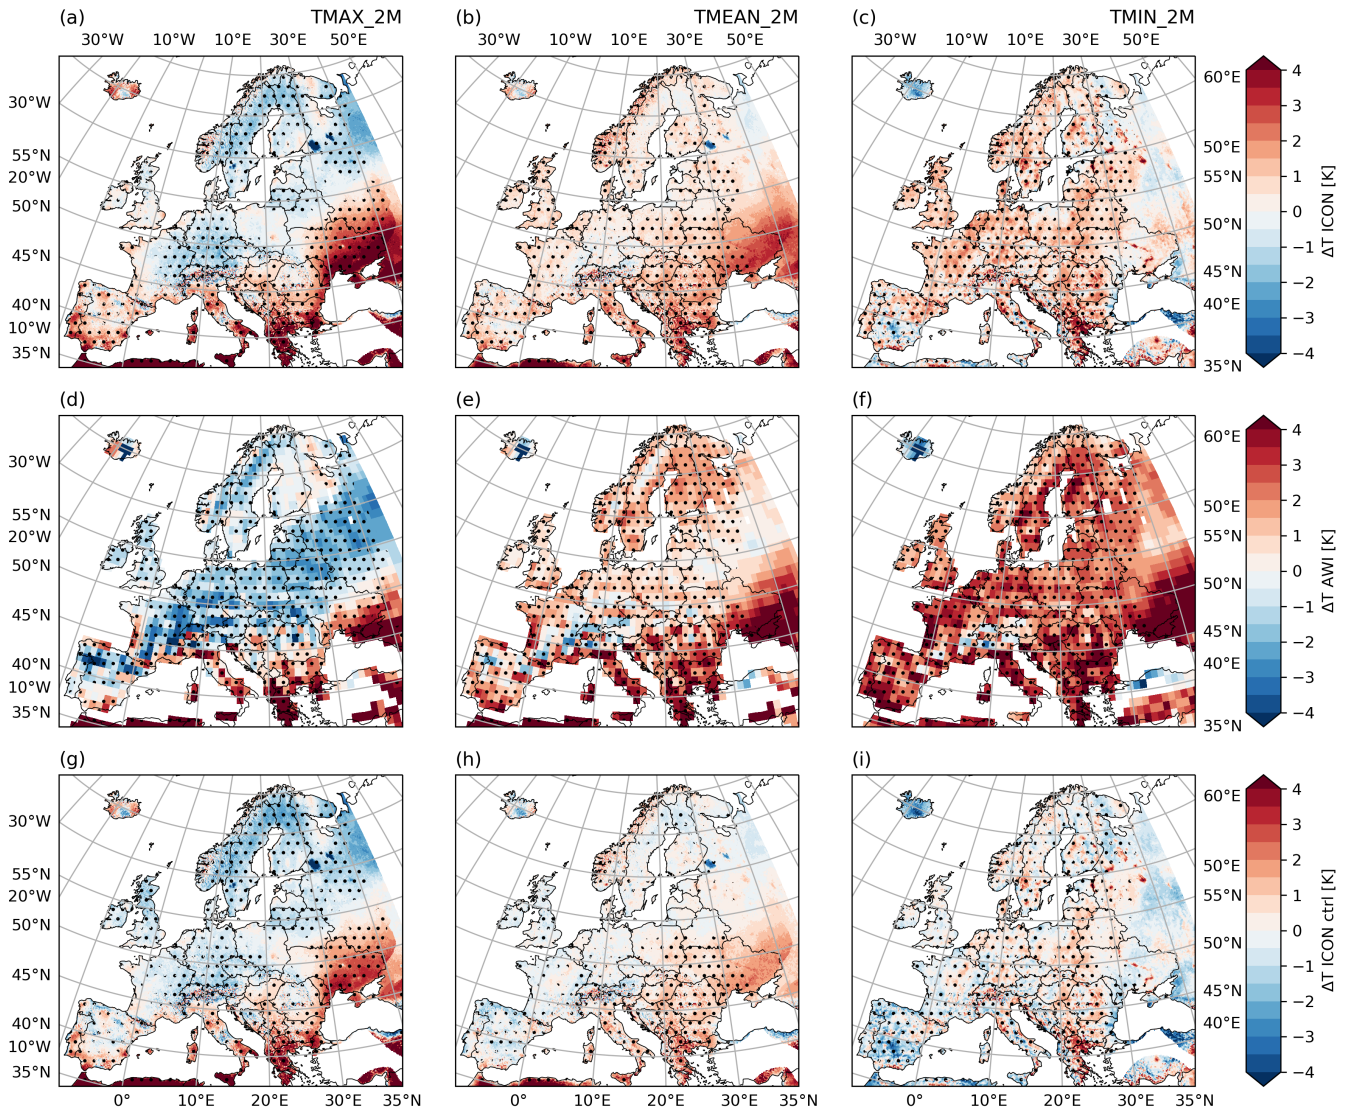

Figure S4: Seasonal mean bias of 2m temperature w.r.t. E-OBS in 2018-2022 for (a-c) ICON EUR-12 simulation, (d-f) AWI-CM1 simulation, (g-i) ICON EUR-12 control simulation driven by ERA5. Hatched areas indicate regions where the bias to E-OBS is statistically significant with a p-value threshold of 0.0

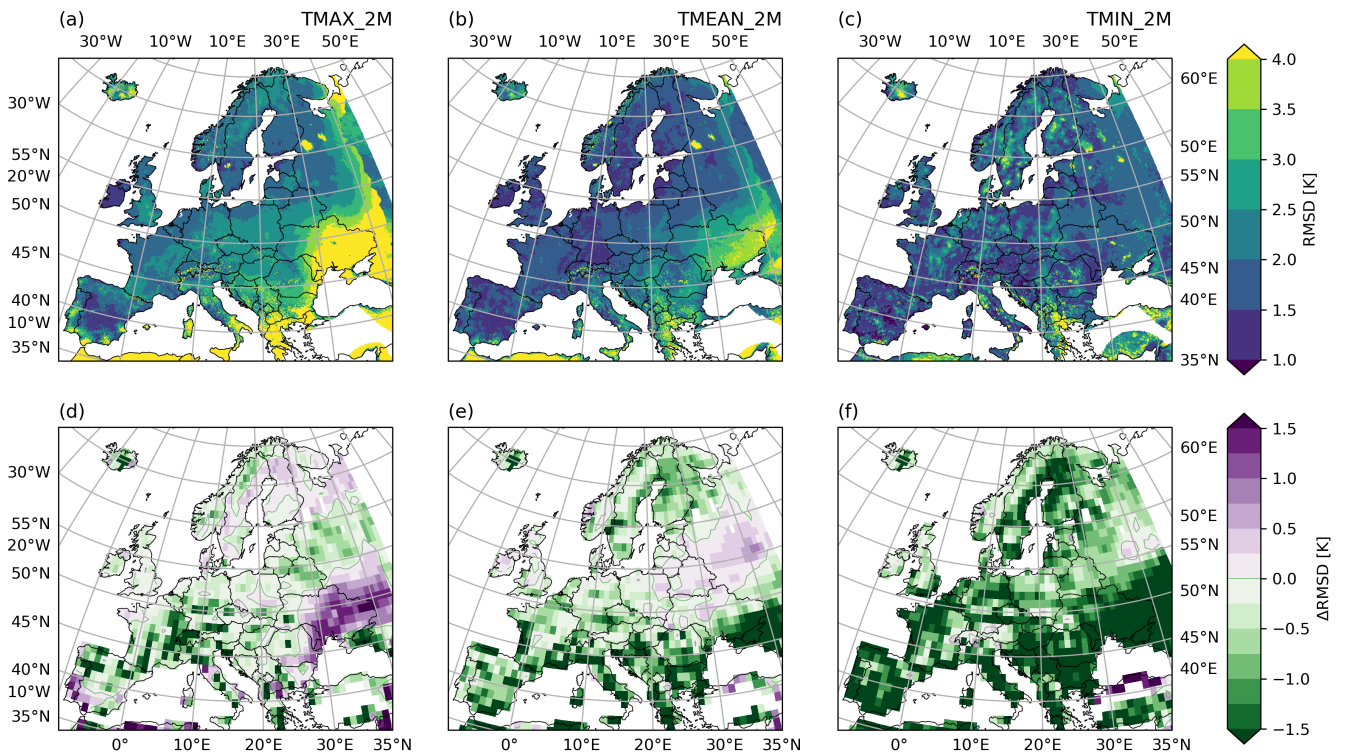

Figure S5: Added value assessment of the ICON EUR-12 simulation for June, July, August 2018-2022 for daily maximum (left column), mean (middle column), and minimum (right column) 2m temperature. (a-c): root mean square difference (RMSD) of the simulated daily 2m temperatures by ICON EUR-12 to E-OBS. (d-f): Change in RMSD achieved by dynamical downscaling; the green colours correspond to the reduced squared error of daily temperatures.

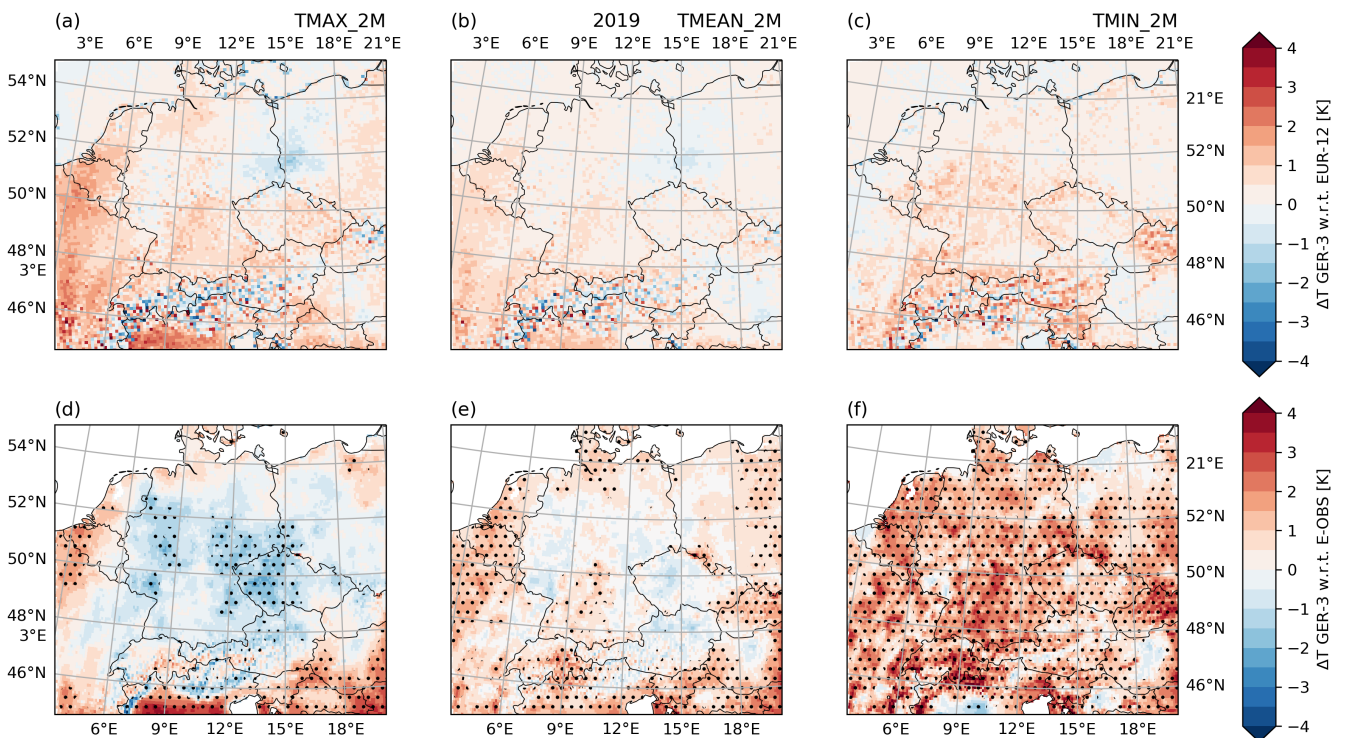

Figure S6: Mean JJA bias of 2m temperature of the nested convective permitting GER-3 simulation in 2019 (a-c) with respect to EUR-12, (d-f) with respect to E-OBS; hatched areas indicate regions where the bias to E-OBS is statistically significant with a p-value threshold of 0.05

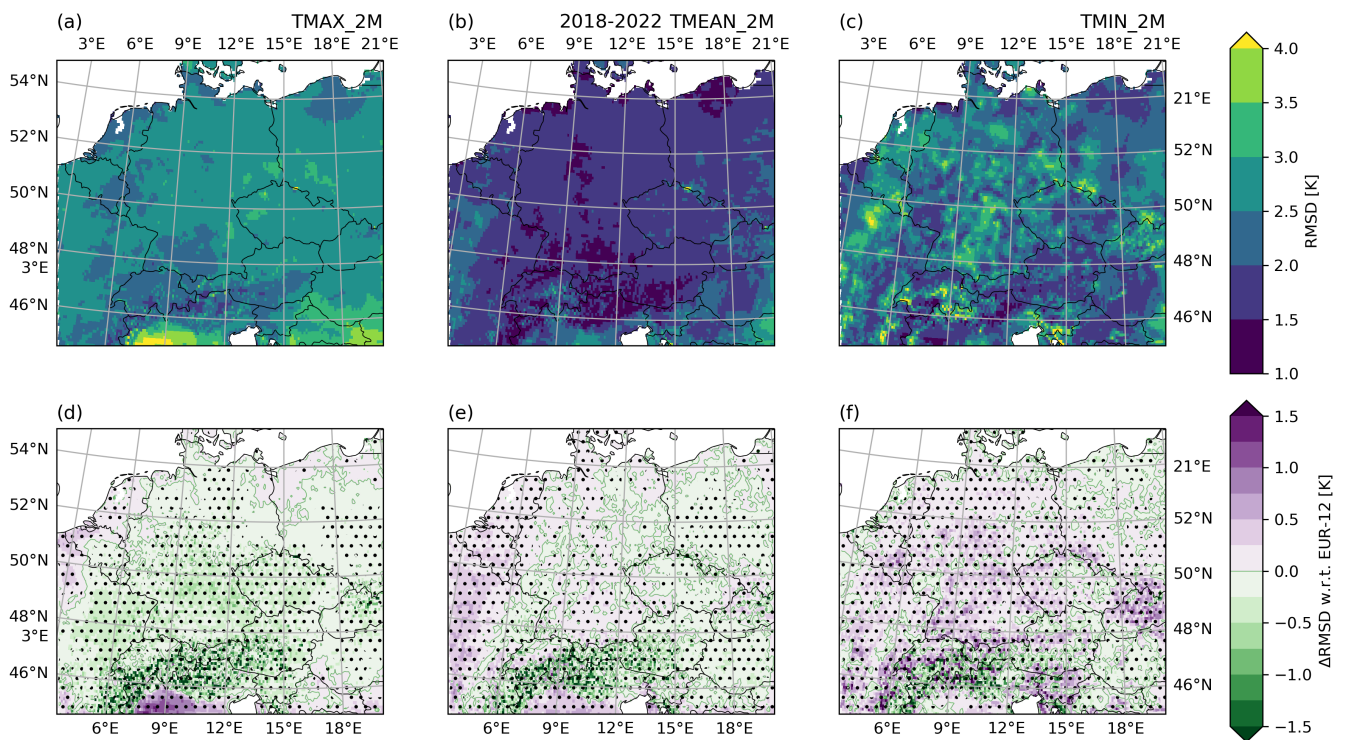

Figure S7: Added value assessment of the ICON GER-3 simulation for June, July, August 2018-2022 for daily maximum (left column), mean (middle column), and minimum (right column) 2m temperature. (a-c): root mean square difference (RMSD) of the simulated daily 2m temperatures by ICON GER-3 to E-OBS. (d-f): Change in RMSD w.r.t. EUR-12 simulation achieved by dynamical downscaling; the green colours correspond to the reduced squared error of daily temperatures.



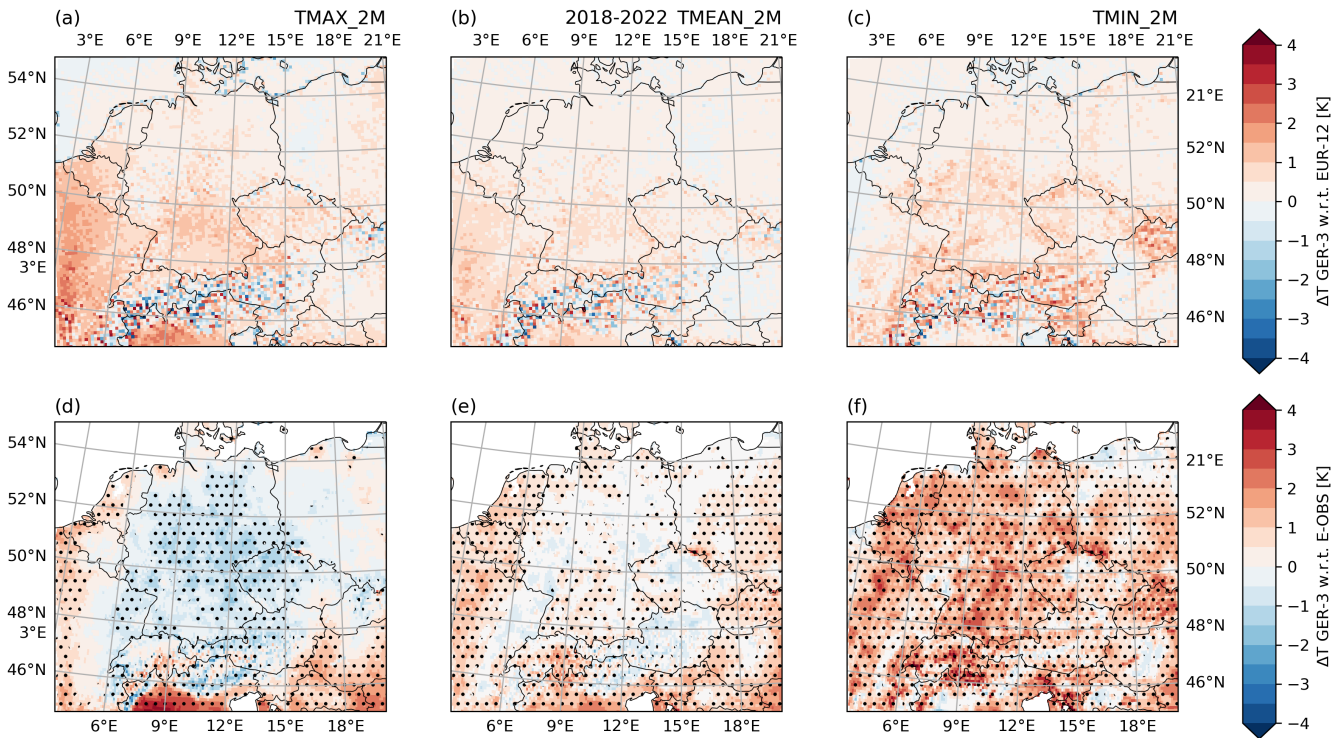

Figure S8: Mean JJA bias of 2m temperature of the nested convective permitting GER-3 simulation in 2018-2022 (a-c) with respect to EUR-12, (d-f) with respect to E-OBS; hatched areas indicate regions where the bias to E-OBS is statistically significant with a p-value threshold of 0.05

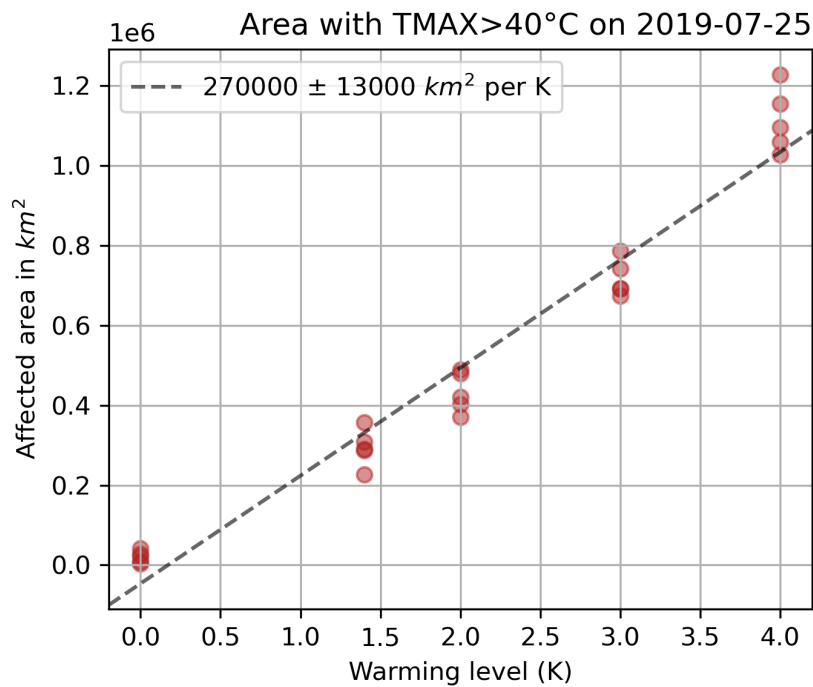

Figure S9: The European area affected by the daily maximum temperatures over 40 °C on 25.07.2019 against the warming level, based on the EUR-12 simulation. The number in the legend is the increase of the area per 1 K of global warming if approximated linearly.

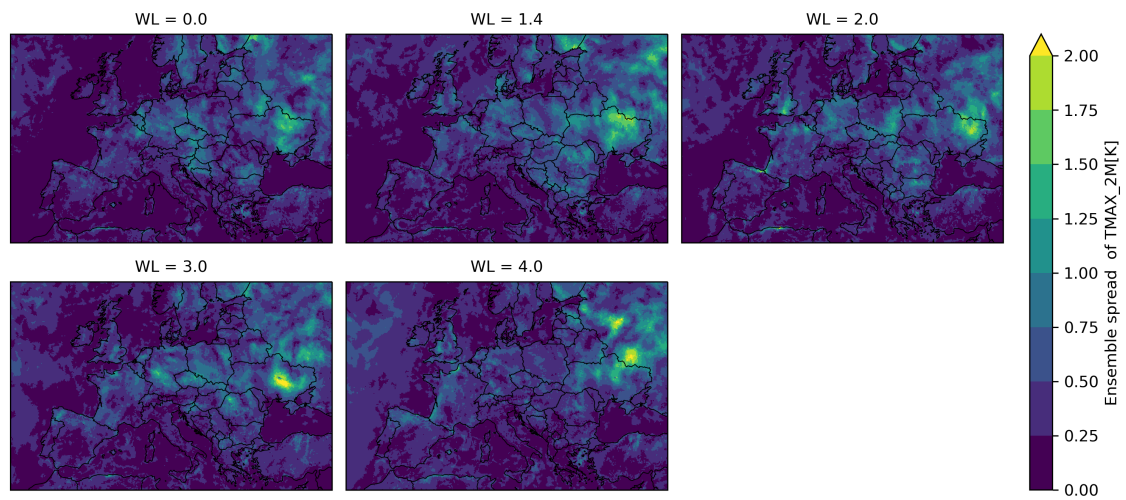

Figure S10: Ensemble spread of 5-day mean daily maximum temperature of the EUR-12 simulation for the period from 23.07 to 27.07 of the dynamical year 2019 at each warming level.

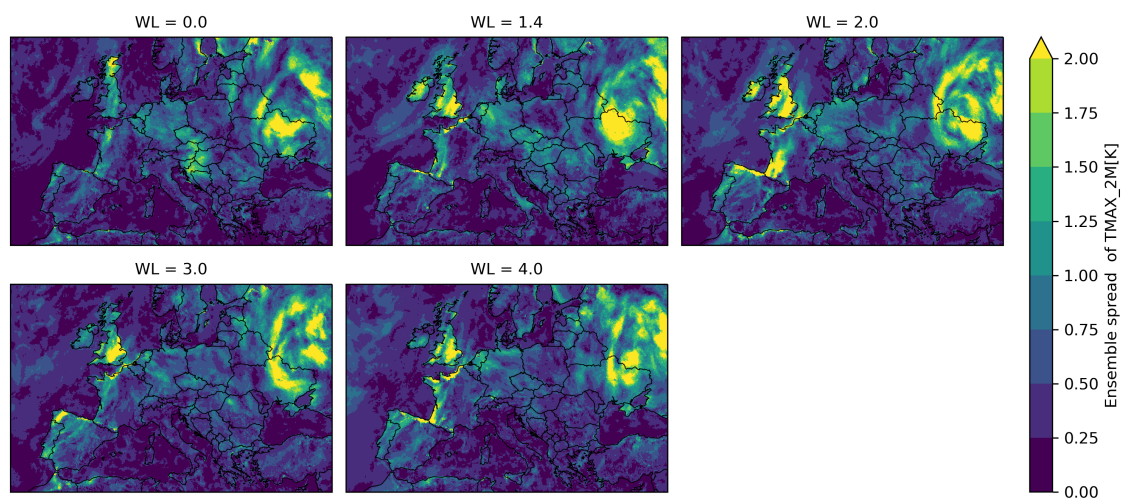

Figure S11: Ensemble spread of 5-day mean daily maximum temperature of the EUR-12 simulation on 25.07 of the dynamical year 2019 at each warming level.

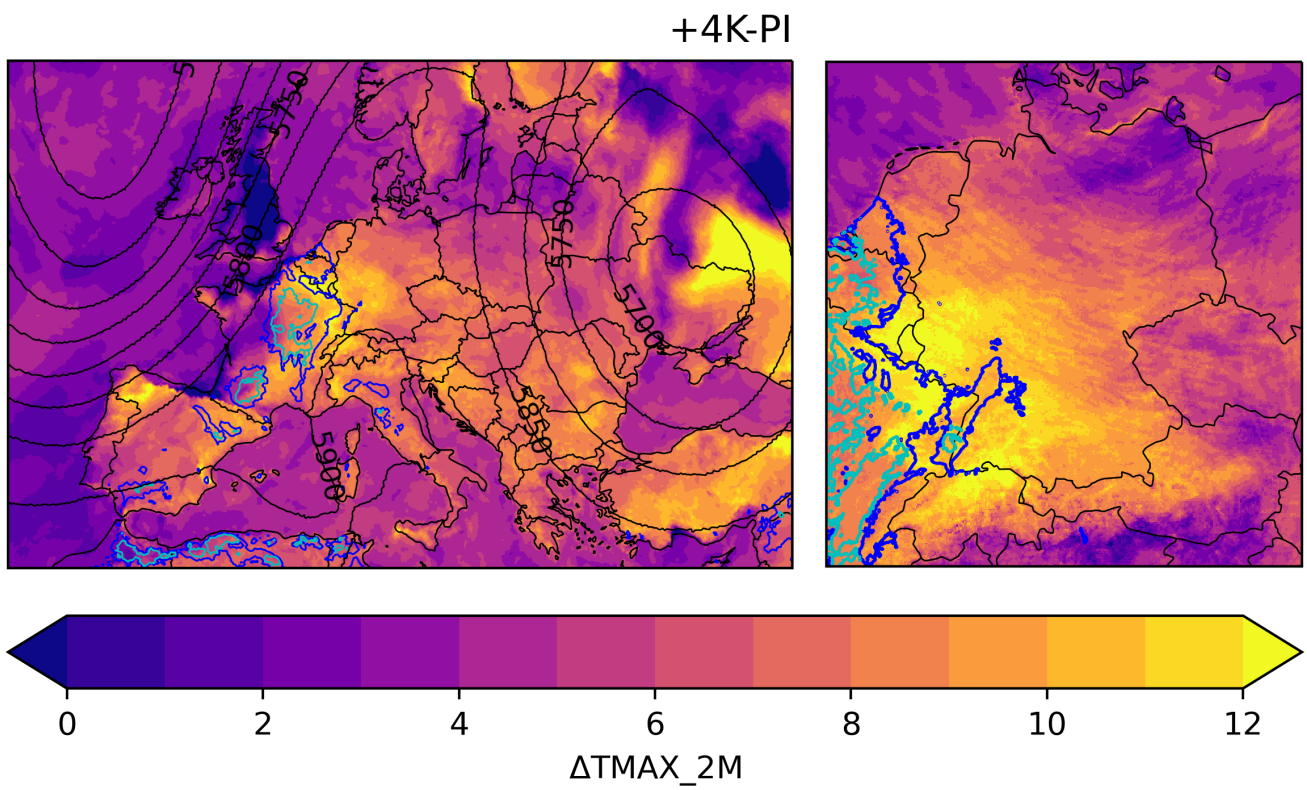

Figure S12: Difference of the maximum 2m temperature on 25.07.2019 between the +4 K warmer world and the pre-industrial climate (ensemble member 1). Contour lines represent the maximum 2m temperature in the present-day ICON (left) EUR-12 and (right) GER-3 simulations; blue contour: 40°C, Cyan contour: 42°C

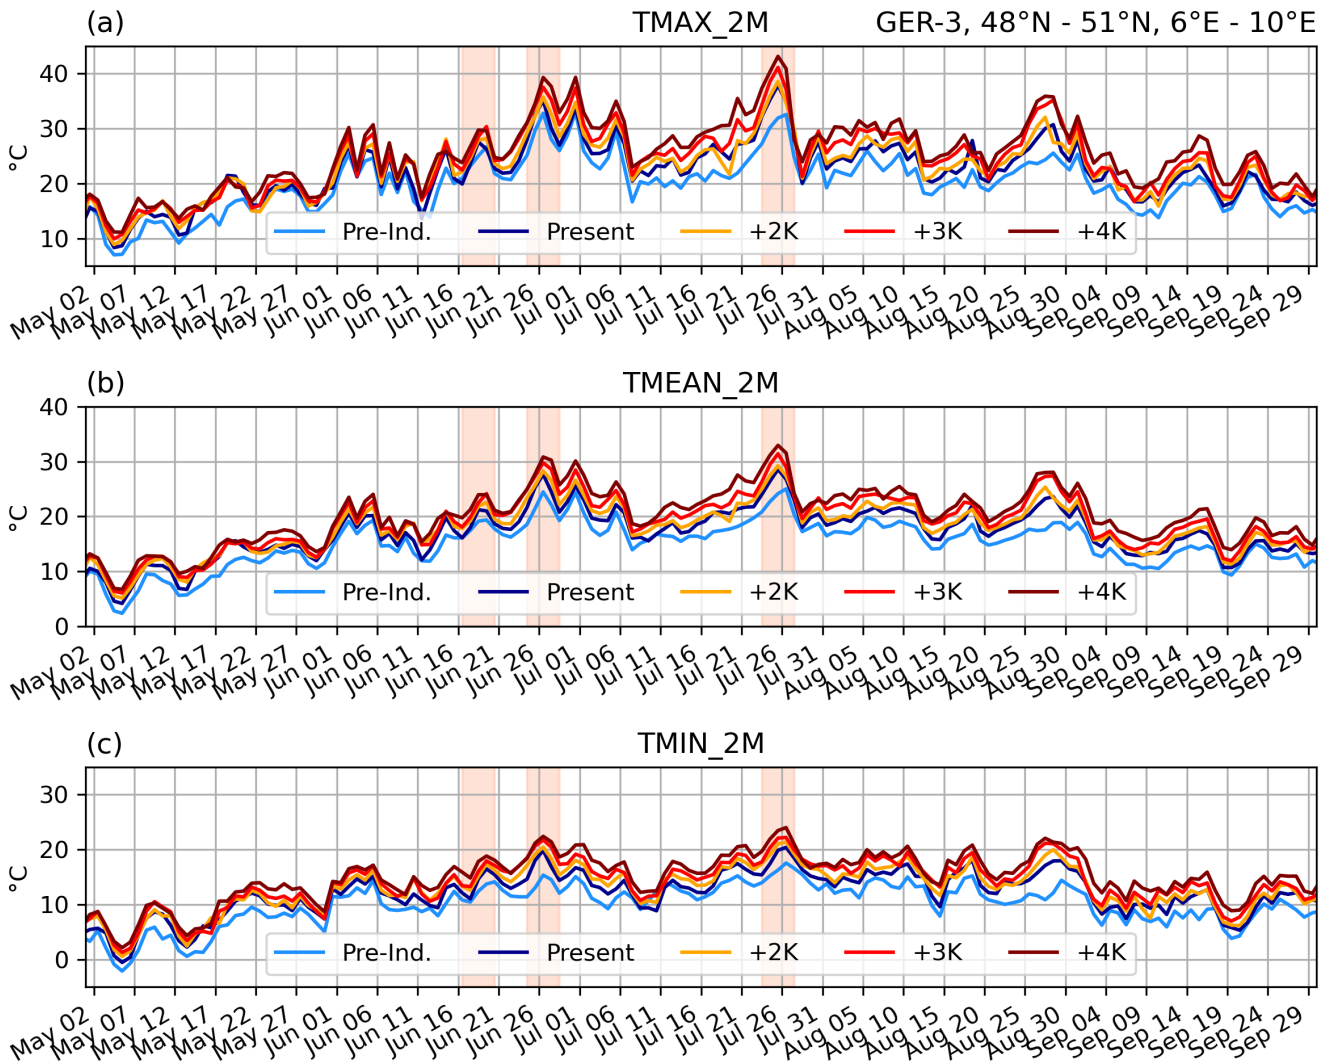

Figure S13: Daily (a) maximum, (b) mean, and (c) minimum temperatures averaged over the longitude/latitude box with boundaries 48° N - 51° N and 6° E - 10° E (see Fig. 1b) over the MJJAS period of the year 2019 based on the GER-3 storyline simulations. The three highlighted periods (orange) are discussed in detail in section 3.3.

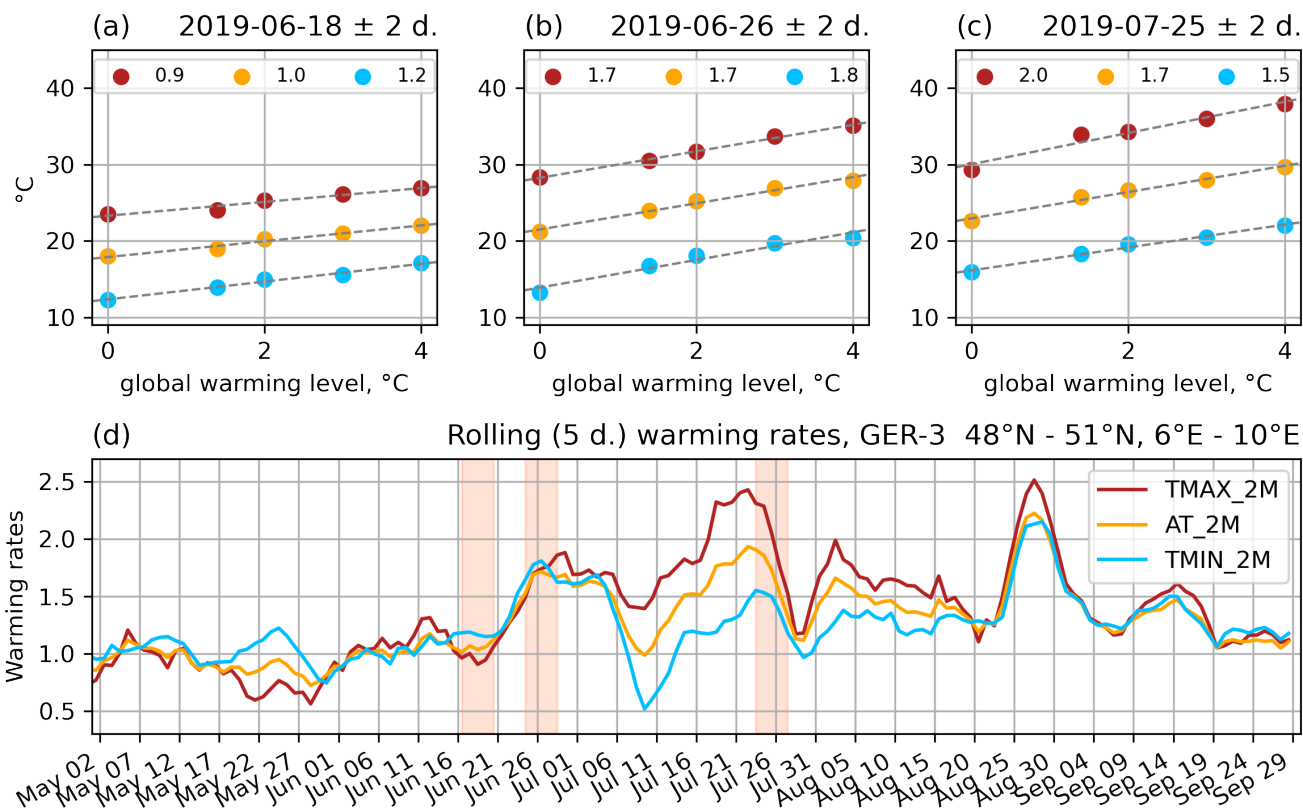

Figure S14: (a-c) Daily maximum (red), mean (orange), and minimum (blue) 2m temperature over the longitude/latitude box 48° N - 51° N, 6° E - 10° E averaged over three 5-day periods plotted against the global warming level. The numbers in the legend represent the slopes of the respective lines; (d) warming rates for the rolling average (5-day window) of daily maximum, mean, and minimum temperatures over the same box. The three highlighted periods are discussed in detail in section 3.3. Based on the GER-3 simulation.

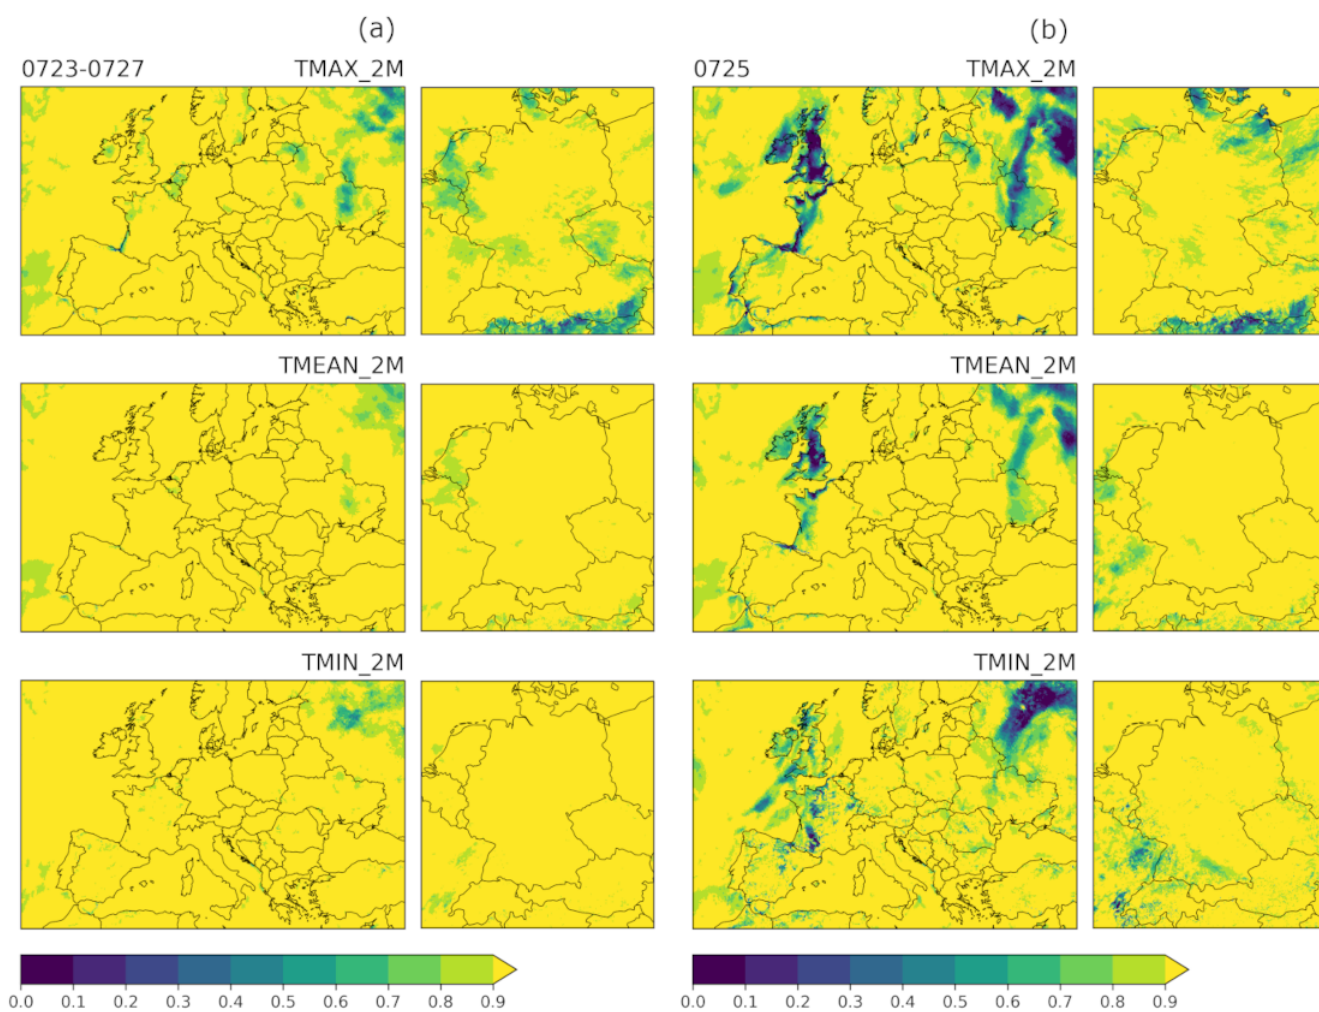

Figure S15: Goodness of linear fit (R-squared) for warming rates of maximum, mean, and minimum 2m temperatures (a) over the period from 23.07.2019 to 27.07.2019, (b) on 25.07.2019.

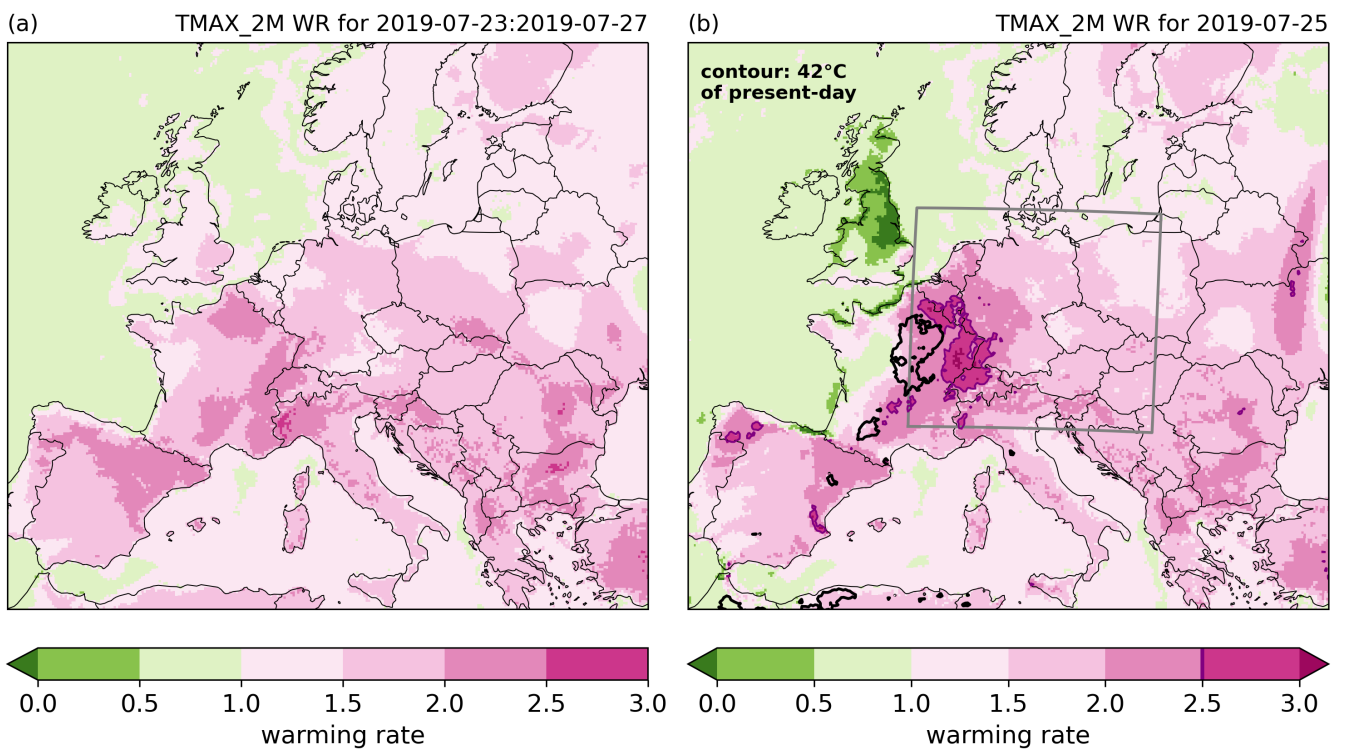

Figure S16: (a) Mean warming rates over the period from 23.07.2019 to 27.07.2019; (b) Warming rates for the 25.07.2019. Black contour in (b) surrounds the core area of the heatwave in the present-day climate. The gray box in (b) shows the boundaries of the GER-3 domain.

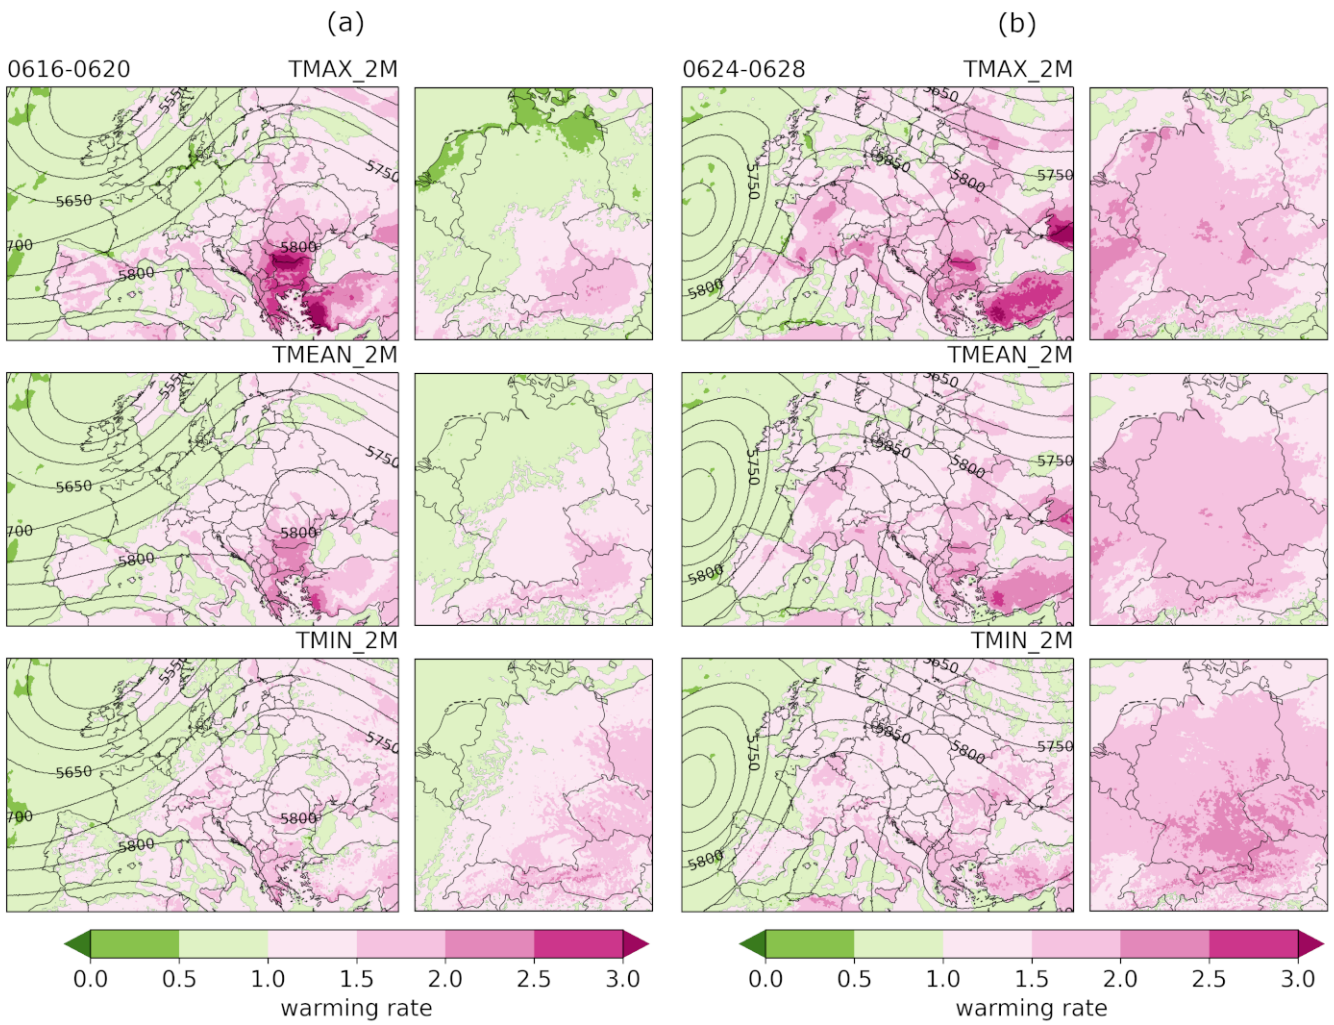

Figure S17: (a) Warming rates for the period from 16.06.2019 to 20.06.2019. (b) Warming rates for the period from 24.06.2019 to 28.06.2019. Contours: geopotential height as of the EUR-12 present-day simulation (ensemble member 1).
